# Supplementary material
Source: publisher site journal article supplement (https://www.dovepress.com/article/451049)
Supplement: Supplementary file 1 [file get_supplementary_file.php]

**Table S1** Primer sequences

| **Gene Name** | **Primer Orientation** | **Sequence** |
| --- | --- | --- |
| FBL | Forward | 5’-AACGCAGTAATGAAGCCAGGT-3’ |
| Reverse | 5’-AAGTGTCCTCCATTCCGCAG-3’ |
| MYD88 | Forward | 5’-GAGGCTGAGAAGCCTTTACAGG-3’ |
| Reverse | 5’-GCAGATGAAGGCATCGAAACGC-3’ |
| CD14 | Forward | 5’-GCTGGAACAGGTGCCTAAA-3’ |
| Reverse | 5’-CCGTCCAGTGTCAGGTTATC-3’ |
| TNF | Forward | 5’-CCTGGTATGAGCCCATCTATCT-3’ |
| Reverse | 5’-CAGGGCAATGATCCCAAAGT-3’ |
| TRADD | Forward | 5’-AGGGTCAGCCTGTAGTGAA-3’ |
| Reverse | 5’-ACCTTGCGCCATTTGAGA-3’ |
| NFKB1 | Forward | 5’-GAGACATCCTTCCGCAAACT-3’ |
| Reverse | 5’-GGTCCTTCCTGCCCATAATC-3’ |
| GAPDH | Forward | 5’-GGTGAAGGTCGGTGTGAACG-3’ |
| Reverse | 5’-CTCGCTCCTGGAAGATGGTG-3’ |
